# Supplementary material for: Synthesis of a series of porous aromatic frameworks by mechanical ball milling
Source: Royal Society of Chemistry journal article supplement (doi:10.1039/d2nj04959g), 2022-01-01
Supplement: d2nj04959g1.pdf [file d2nj04959g1.pdf]

Supporting Information

Synthesis of A Series of Porous Aromatic Frameworks by

Mechanical ball milling.

Xiaolu Chen, Zhenyan Yuan, Yingchun Zhong, Fuxing Sun, Hao Ren\*

*State Key Laboratory of Inorganic Synthesis and Preparative Chemistry, College of  
Chemistry, Jilin University, Changchun 130012, China*

## 1 Experimental Section

### 1.1 Chemicals

p-terphenyl (purity 98%) and o-terphenyl (purity, 98%) were purchased from Shanghai Aladdin Bio-Chem Technology Co., LTD. Anhydrous FeCl<sub>3</sub> (purity, 99%); Formaldehyde dimethyl acetal (FDA, purity, 98%) and anhydrous methanol were purchased from Anhui Zesheng Technology Co., LTD (Energy Chemical). Other reagents were purchased from commercial suppliers.

### 1.2 Synthesis of PAF-104s and PAF-105s

#### 1.2.1 Synthesis of PAF-104a-c and PAF-105a-c

The synthetic process of PAF-104a-c and PAF-105a-c are consistent, and the molar ratio of FeCl<sub>3</sub> and p-terphenyl or o-terphenyl is adjusted as 3:1, 6:1 and 12:1, respectively. Taking PAF-104a as an example, the specific procedures are as follows: Firstly, anhydrous FeCl<sub>3</sub> (1.056 g, 6.51 mmol) and p-terphenyl (500 mg, 2.17 mmol) with a molar ratio of 3:1 is added into the stainless steel ball grinding tank. Then, the stainless steel ball grinding tank is sealed and tightened and put into the ball mill. After ball grinding 2 h, the product is washed with HCl (1M), H<sub>2</sub>O and anhydrous methanol successively. The product is further Soxhlet extracted with anhydrous methanol for 24 h. Finally, the obtained product is dried under vacuum at 120 °C for 12 h (440 mg, 88 %).

#### 1.2.2 Synthesis of PAF-104d-g and PAF-105d-g

The synthetic process of PAF-104d-g and PAF-105d-g are consistent, and the molar ratio of FeCl<sub>3</sub> and p-terphenyl or o-terphenyl is adjusted as 3:1, 6:1 and 12:1, respectively. Taking PAF-104d as an example, the specific procedures are as follows: Firstly, anhydrous FeCl<sub>3</sub> (1.056 g, 6.51 mmol) and p-terphenyl (500 mg, 2.17 mmol) are added into the stainless steel ball grinding tank. Then FDA (0.55 mL, 6.51 mmol) is added, and the molar ratio of FeCl<sub>3</sub>, FDA and p-terphenyl is 3:3:1. The stainless steel ball grinding tank is sealed and tightened and put into the ball mill. After ball grinding 2 h, the product is washed with HCl (1M), H<sub>2</sub>O and anhydrous methanol successively. The product is further Soxhlet extracted with anhydrous methanol for 24 h. The

obtained product was dried under vacuum at 120 °C for 12 h (449 mg, 89 %).

### 1.3 Instruments

Fourier transform infrared (FT-IR) spectra were determined by Bruker VERTEX 80 using the KBr pellet technique. Scanning electron Microscope (SEM) was performed by JEOL Jsm-6700f. Elemental analysis was tested by Vario Micro Cube Elemental Analyzer. Thermal gravimetric analysis (TGA) was carried out on TA Q500 Thermogravimetric Analyzer at the heating rate of 10 °C min<sup>-1</sup> under air condition. X-ray photoelectron spectroscopy (XPS) was performed with Thermo ESCALAB 250 X-ray Photoelectron Spectroscopy. Solid-state <sup>13</sup>C CP/MAS NMR measurement was performed on a Bruker Avance Neo 600WB NMR spectrometer. The Nitrogen adsorption isotherms were measured on the Quantachrome Autosorb-iQ<sub>2</sub> analyzer at 77 K. The gas sorption isotherms were measured using Quantachrome Autosorb-iQ<sub>2</sub> adsorption analyzer.

### 2 Isotherms fitting and IAST calculation of selectivity

The adsorption isotherms in PAF-104f and PAF-105g were fitted using a dual-site Langmuir model:

$$q = \frac{q_1^{\max} (b_1 p)^{1/n_1}}{1 + (b_1 p)^{1/n_1}} + \frac{q_2^{\max} (b_2 p)^{1/n_2}}{1 + (b_2 p)^{1/n_2}}$$

Here,  $p$  is the pressure of the bulk gas at equilibrium with the adsorbed phase (kPa),  $q$  is the adsorbed amount per mass of adsorbent (mol kg<sup>-1</sup>),  $q_1^{\max}$  and  $q_2^{\max}$  are the saturation capacities of site A and site B (mol kg<sup>-1</sup>),  $b_1$  and  $b_2$  are the affinity coefficients of site A and B (kPa<sup>-1</sup>),  $n_1$  and  $n_2$  represents the deviation from an ideal homogeneous surface.

The IAST adsorption selectivity for two gases is defined as:

$$S = \frac{q_1 / q_2}{p_1 / p_2}$$

Where  $q_1$  and  $q_2$  are the absolute component loadings of the adsorbed phase in the mixture, and  $p_1$  and  $p_2$  are the component partial pressures.

### 3 Supplementary Figures

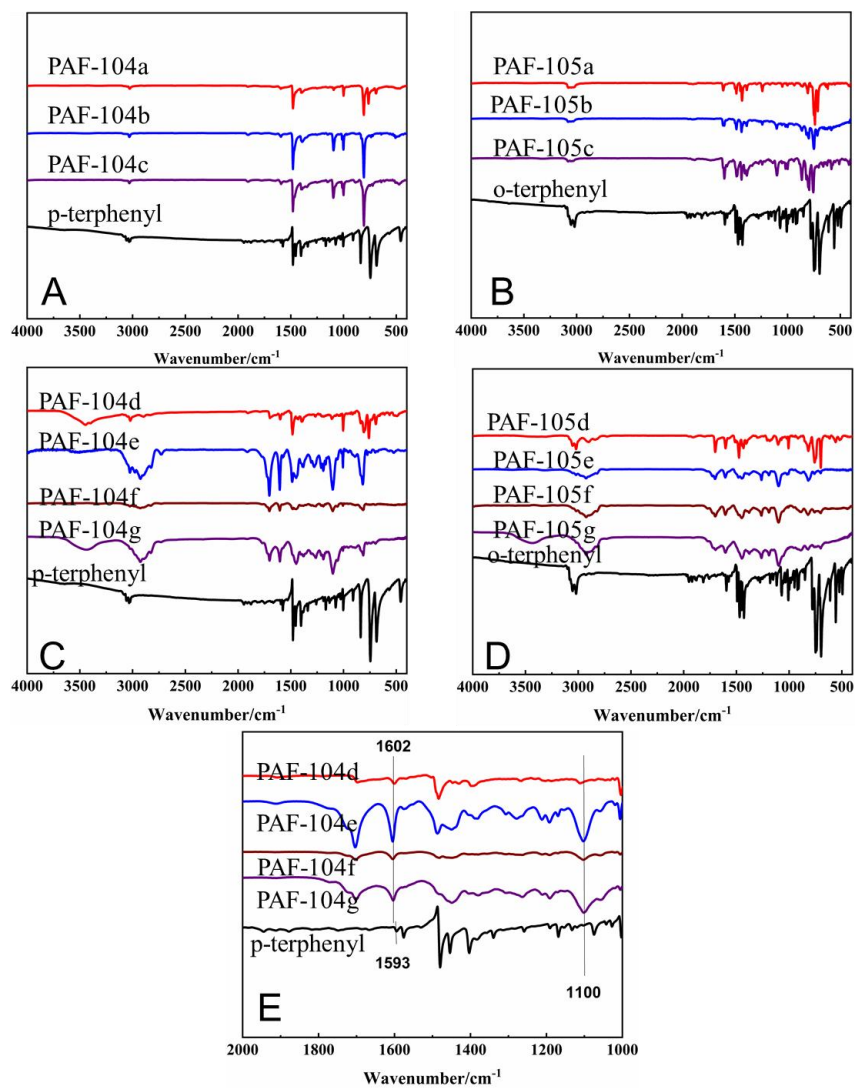

Fig S1 (A, B) FTIR spectra of PAF-104a-c and p-terphenyl, (C, D) FTIR spectra of PAF-104d-g and p-terphenyl, (E) FTIR spectra of PAF-104d-g and p-terphenyl.

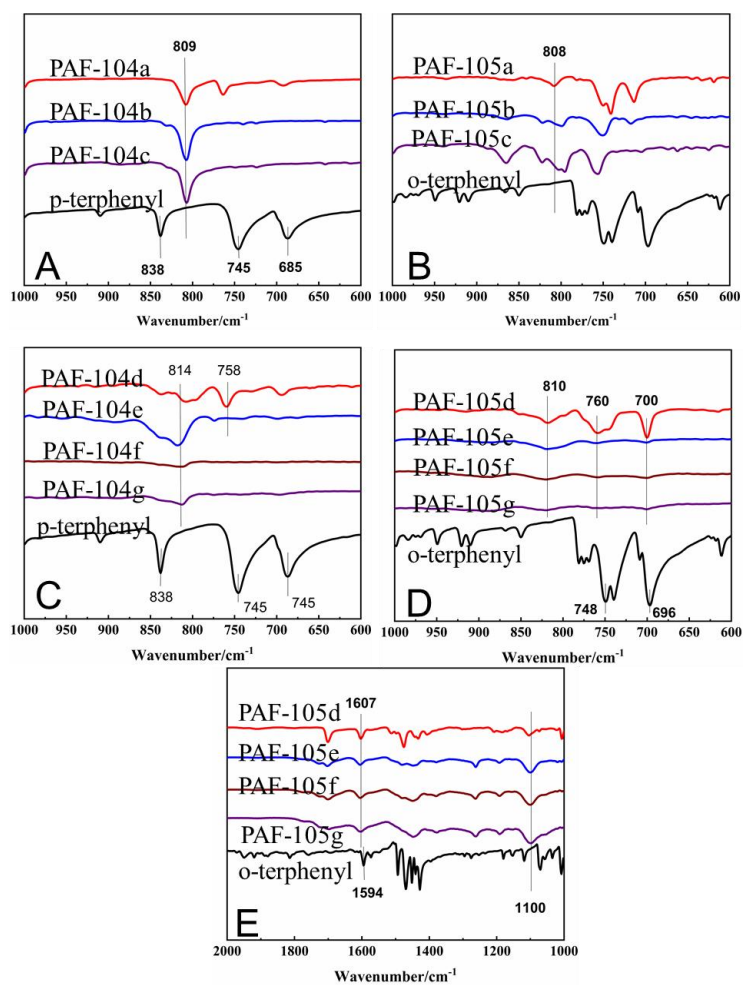

Fig S2 (A, B) FTIR spectra of PAF-105a-c and o-terphenyl, (C, D, E) FTIR spectra of PAF-105d-g and o-terphenyl.

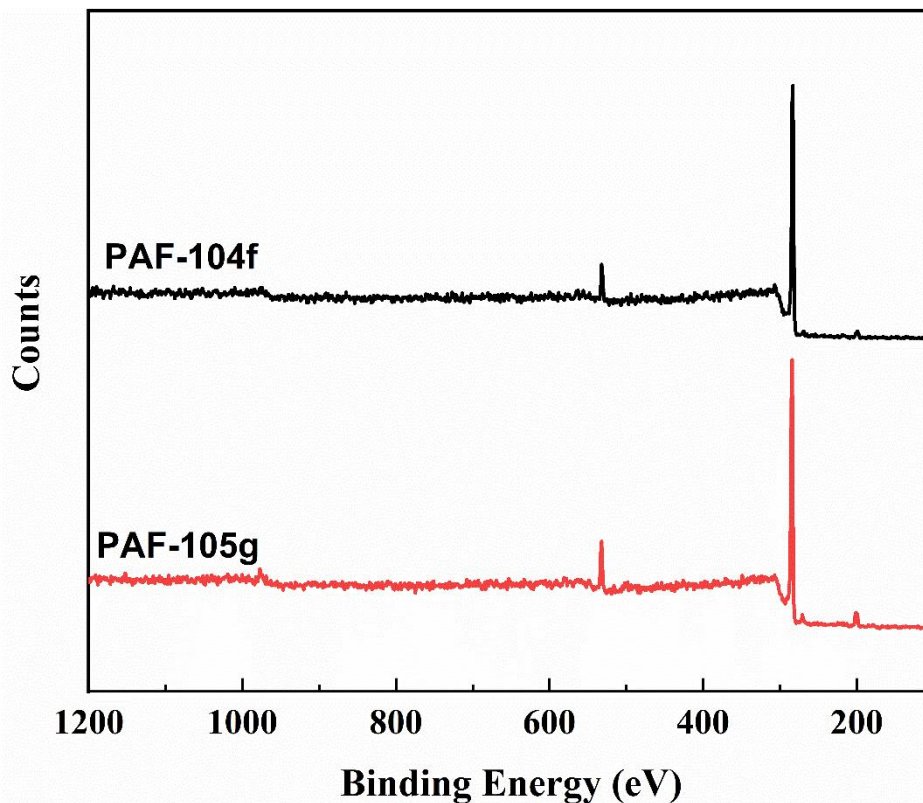

Fig S3 XPS spectra of PAF-104f and PAF-105g.

Table S1 CHON of PAF-104f and PAF-105g.

|          | C(%)  | H(%)  | O(%)   | C/H     |
|----------|-------|-------|--------|---------|
| PAF-104f | 78.68 | 4.993 | 12.644 | 15.7568 |
| PAF-105g | 81.65 | 4.946 | 12.033 | 16.5087 |

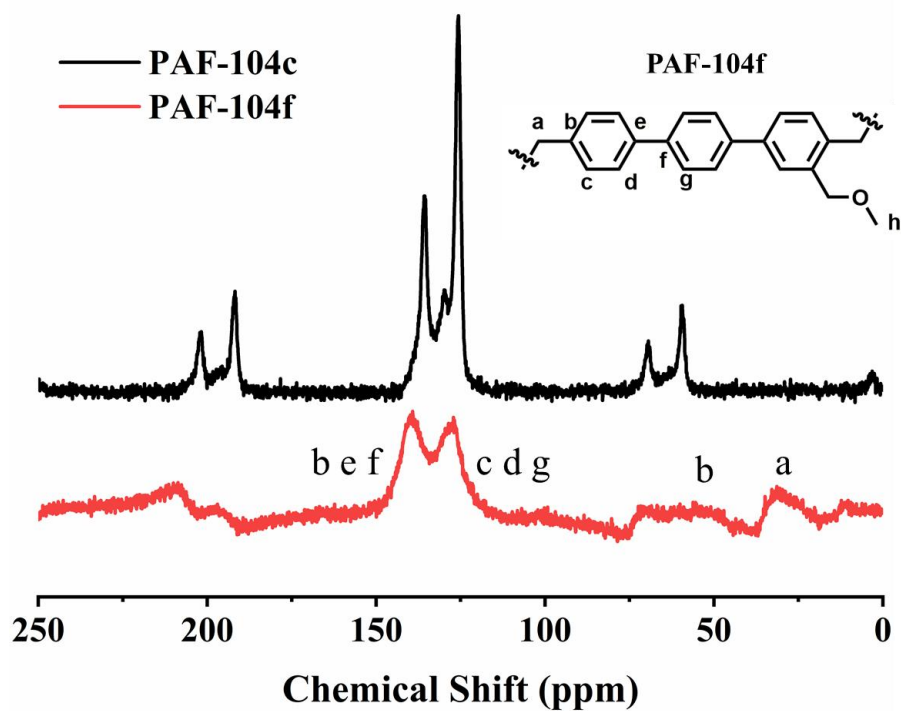

Fig S4  $^{13}\text{C}$  CP/MAS NMR spectra of PAF-104c and PAF-104f.

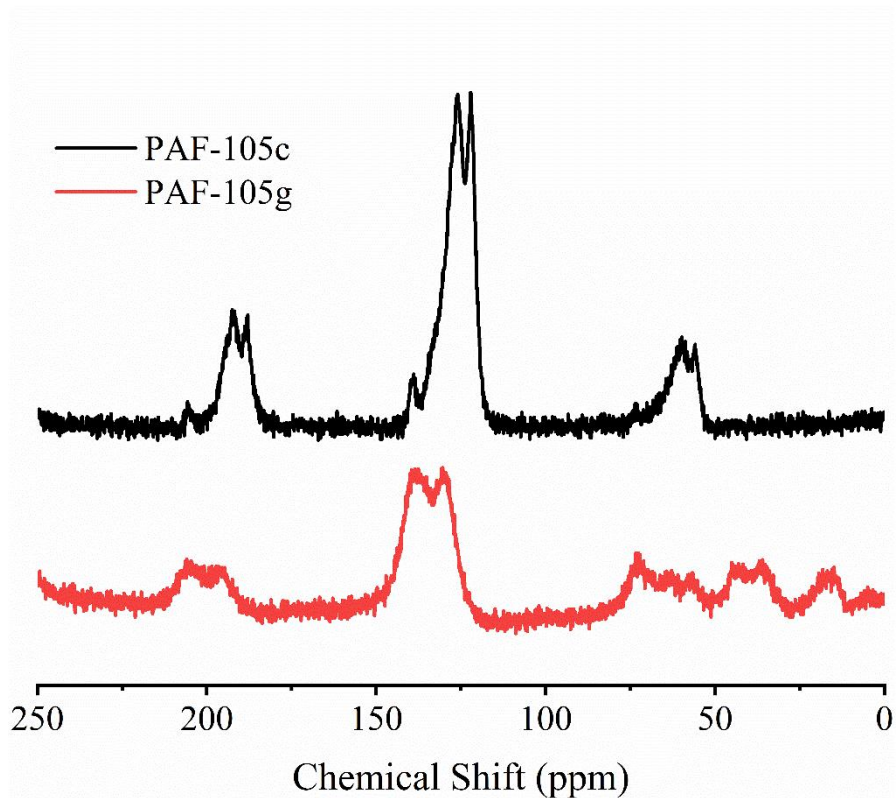

Fig S5  $^{13}\text{C}$  CP/MAS NMR spectra of PAF-105c and PAF-105g.

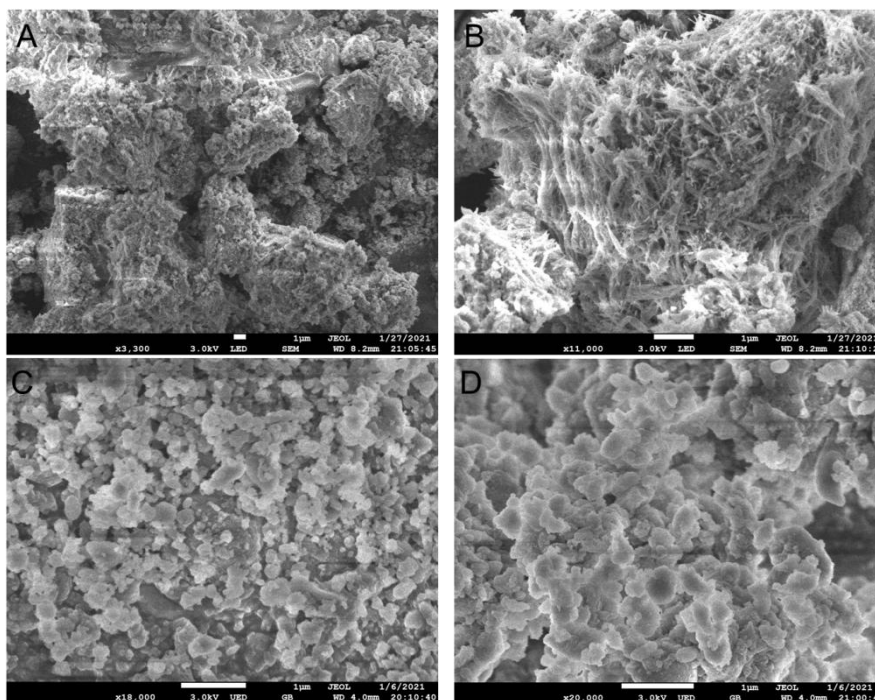

Fig S6 SEM images of PAF-104c (A), PAF-105c (B), PAF-104f (C), and PAF-105g (D).

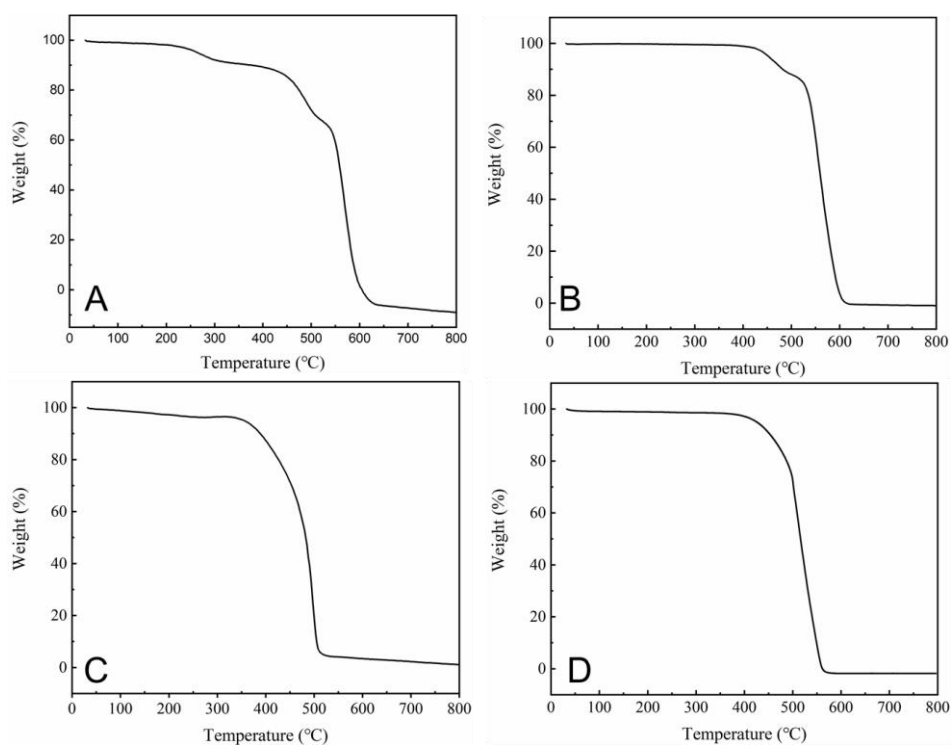

Fig S7 TGA curve of PAF-104c (A), PAF-105c (B), PAF-104f (C), and PAF-105g (D).



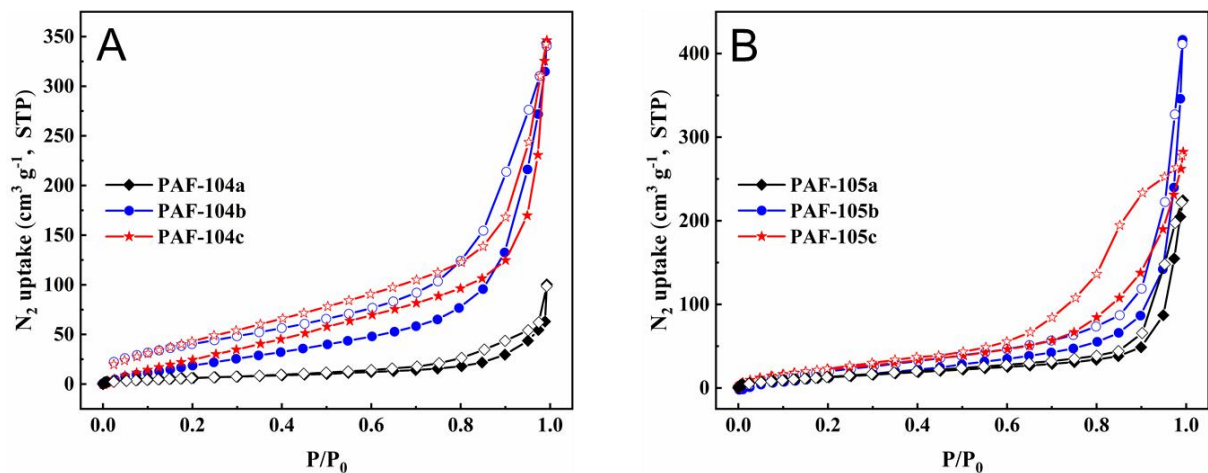

Fig S8 (A) N<sub>2</sub> adsorption-desorption isotherms of PAF-104a-c; (B) N<sub>2</sub> adsorption-desorption isotherms of PAF-105a-c.

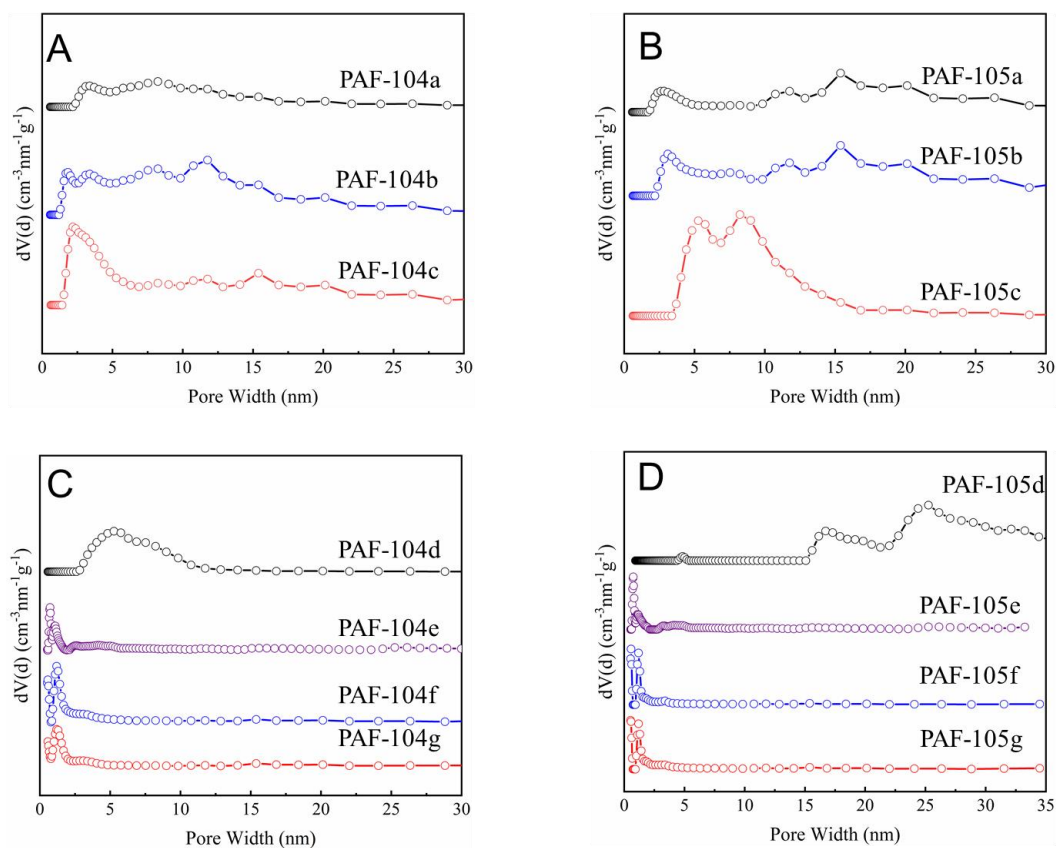

Fig S9 Pore size distribution of PAF-104s (A, C) and PAF-105s (B, D).

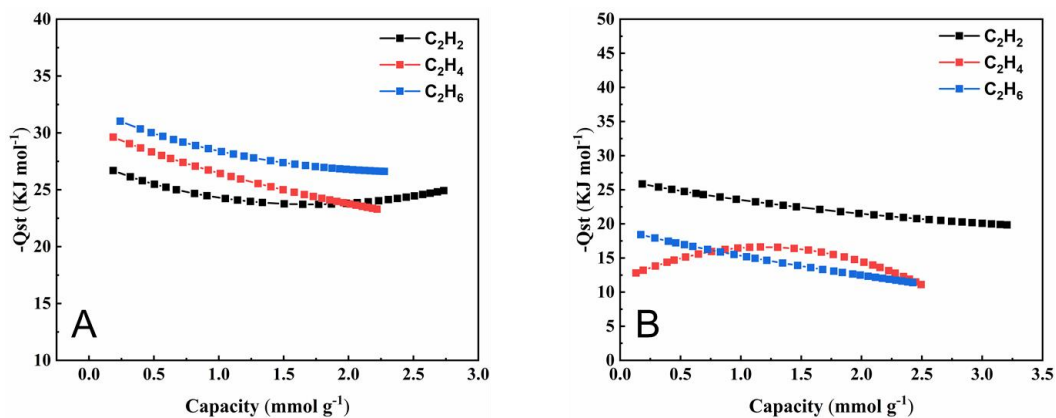

Fig S10 The  $Q_{st}$  of  $\text{C}_2\text{H}_2$ ,  $\text{C}_2\text{H}_4$ , and  $\text{C}_2\text{H}_6$  for PAF-104f (A) and PAF-105g (B)

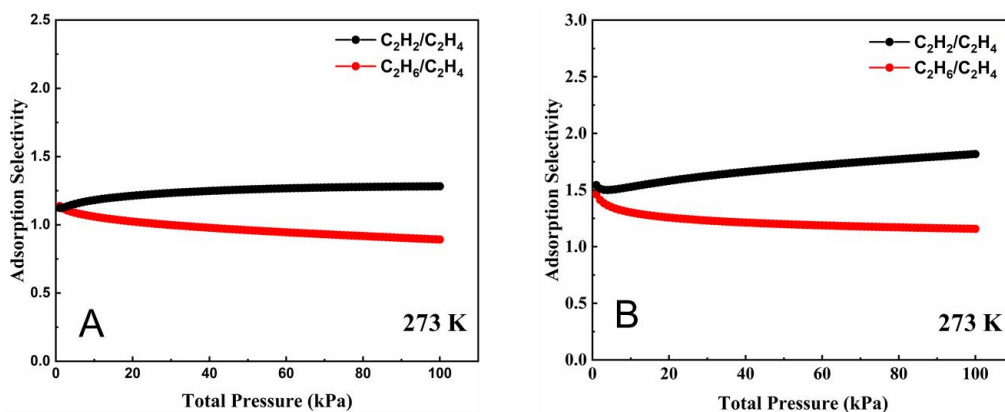

Fig S11 The selectivity of  $\text{C}_2\text{H}_2/\text{C}_2\text{H}_4$  and  $\text{C}_2\text{H}_6/\text{C}_2\text{H}_4$  for PAF-104f (A) and PAF-105g (B) at 273 K.

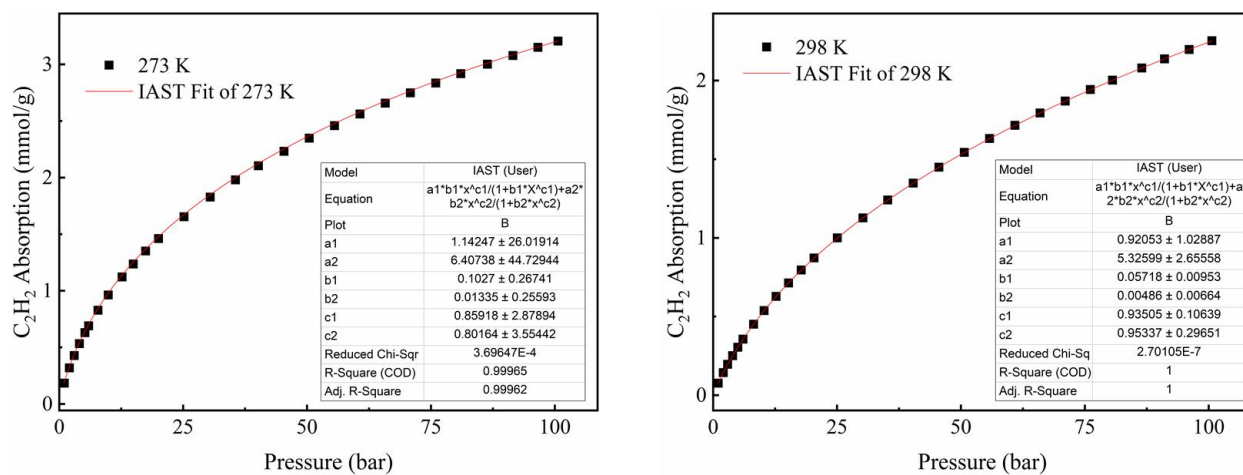

Fig S12 Fitted line plots of  $\text{C}_2\text{H}_2$  for PAF-104f at 273 K and 298 K.

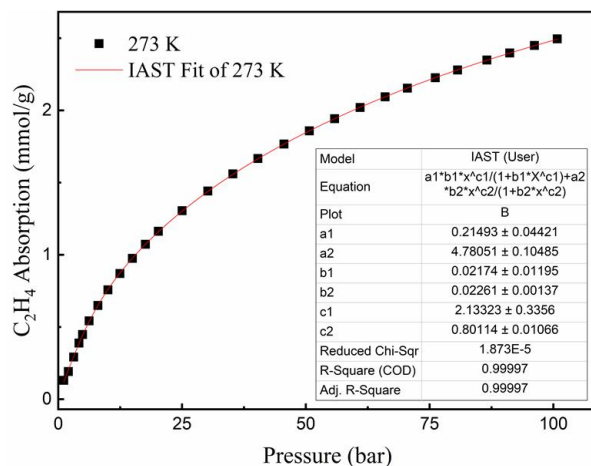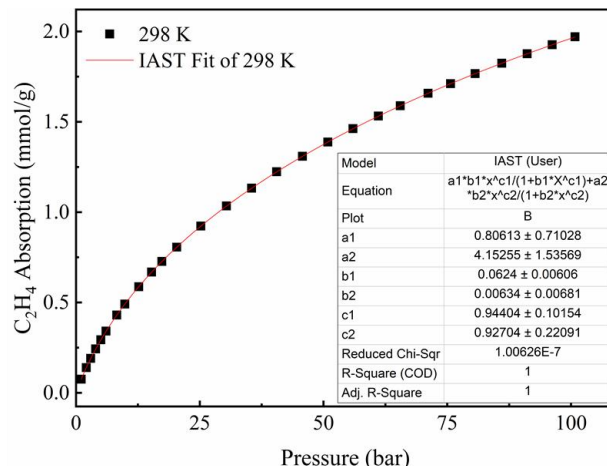

Fig S13 Fitted line plots of C<sub>2</sub>H<sub>4</sub> for PAF-104f at 273 K and 298 K.

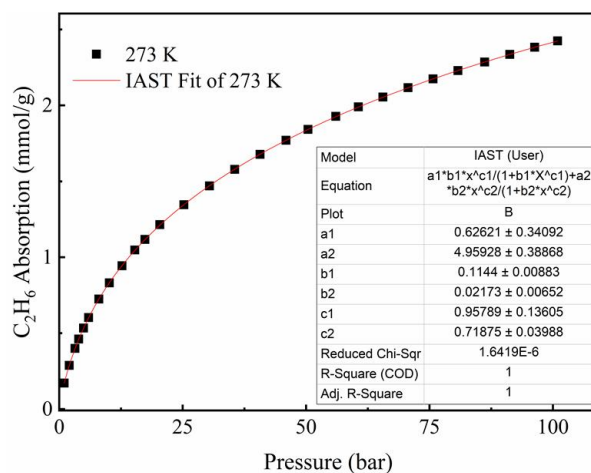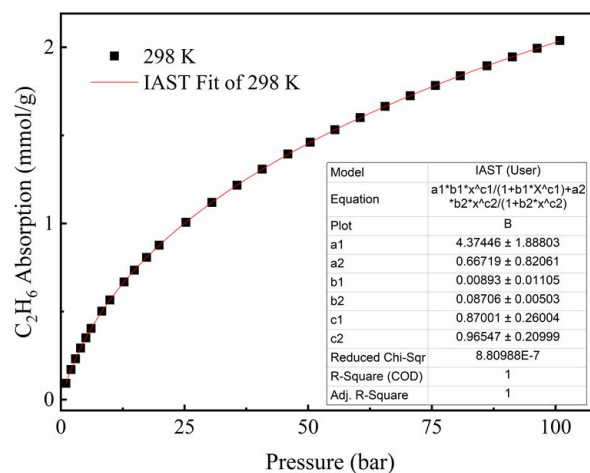

Fig S14 Fitted line plots of C<sub>2</sub>H<sub>6</sub> for PAF-104f at 273 K and 298 K.

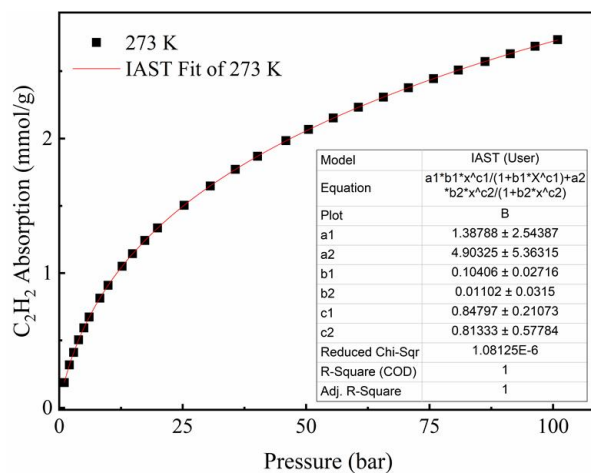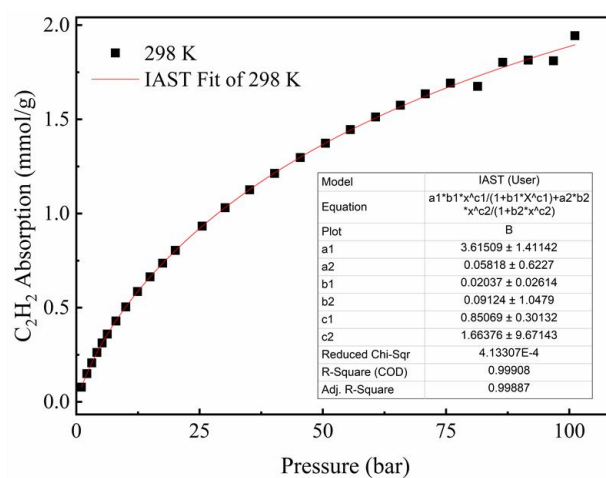

Fig S15 Fitted line plots of C<sub>2</sub>H<sub>2</sub> for PAF-105g at 273 K and 298 K.

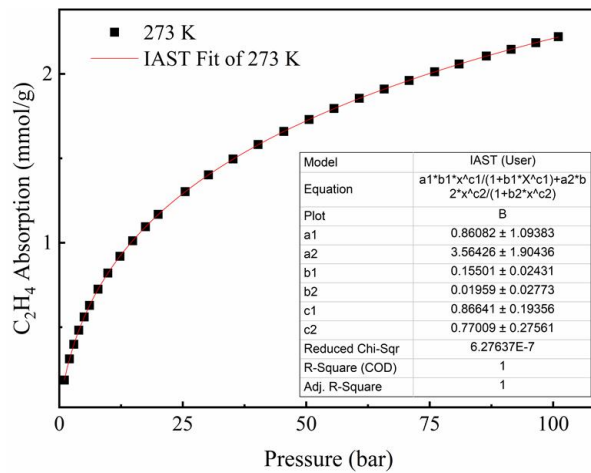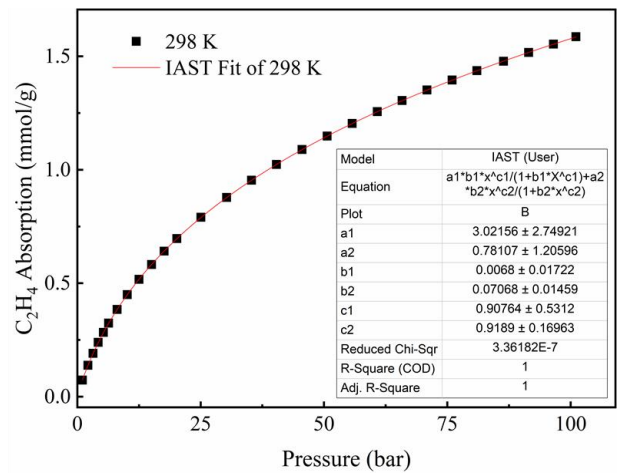

Fig S16 Fitted line plots of C<sub>2</sub>H<sub>4</sub> for PAF-105g at 273 K and 298 K.

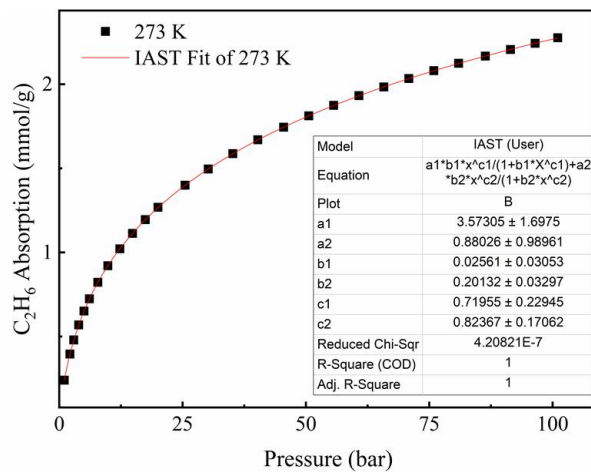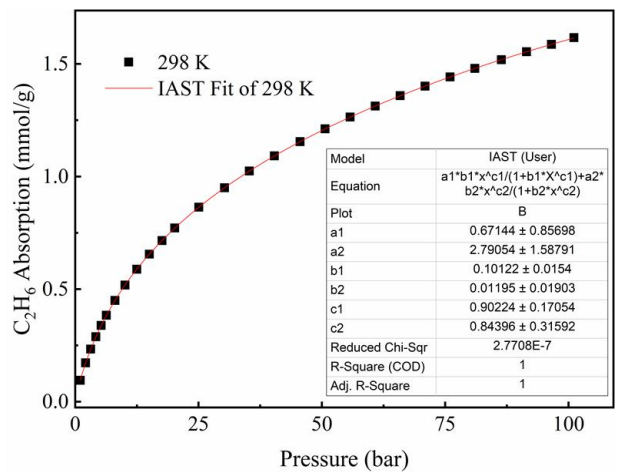

Fig S17 Fitted line plots of C<sub>2</sub>H<sub>6</sub> for PAF-105g at 273 K and 298 K.

Table S2 Dual-site Langmuir fitting parameters of PAF-104f for C<sub>2</sub>H<sub>2</sub>, C<sub>2</sub>H<sub>4</sub>, and C<sub>2</sub>H<sub>6</sub> at 273 K and 298 K.

| 273 K                         | Site A             |                |                  | Site B             |                |                  | R <sup>2</sup> |
|-------------------------------|--------------------|----------------|------------------|--------------------|----------------|------------------|----------------|
|                               | q <sub>1,max</sub> | b <sub>1</sub> | 1/n <sub>1</sub> | q <sub>2,max</sub> | b <sub>2</sub> | 1/n <sub>2</sub> |                |
| C <sub>2</sub> H <sub>2</sub> | 1.14               | 0.10           | 0.86             | 6.41               | 0.01           | 0.80             | 0.9996         |
| C <sub>2</sub> H <sub>4</sub> | 0.21               | 0.021          | 2.13             | 4.78               | 0.022          | 0.80             | 0.9999         |
| C <sub>2</sub> H <sub>6</sub> | 0.63               | 0.11           | 0.95             | 4.95               | 0.02           | 0.72             | 1              |
| 298 K                         | Site A             |                |                  | Site B             |                |                  | R <sup>2</sup> |
|                               | q <sub>1,max</sub> | b <sub>1</sub> | 1/n <sub>1</sub> | q <sub>2,max</sub> | b <sub>2</sub> | 1/n <sub>2</sub> |                |
| C <sub>2</sub> H <sub>2</sub> | 0.92               | 0.06           | 0.93             | 5.32               | 5E-5           | 0.94             | 0.9999         |
| C <sub>2</sub> H <sub>4</sub> | 0.81               | 0.06           | 0.94             | 4.15               | 0.006          | 0.93             | 1              |
| C <sub>2</sub> H <sub>6</sub> | 4.37               | 0.01           | 0.87             | 0.66               | 0.08           | 0.96             | 1              |

Table S3 Dual-site Langmuir fitting parameters of PAF-105g for C<sub>2</sub>H<sub>2</sub>, C<sub>2</sub>H<sub>4</sub>, and C<sub>2</sub>H<sub>6</sub> at 273 K and 298 K.

| 273 K                         | Site A             |                |                  | Site B             |                |                  | R <sup>2</sup> |
|-------------------------------|--------------------|----------------|------------------|--------------------|----------------|------------------|----------------|
|                               | q <sub>1,max</sub> | b <sub>1</sub> | 1/n <sub>1</sub> | q <sub>2,max</sub> | b <sub>2</sub> | 1/n <sub>2</sub> |                |
| C <sub>2</sub> H <sub>2</sub> | 1.39               | 0.10           | 0.85             | 4.90               | 0.01           | 0.81             | 1              |
| C <sub>2</sub> H <sub>4</sub> | 0.86               | 0.15           | 0.86             | 3.56               | 0.02           | 0.77             | 1              |
| C <sub>2</sub> H <sub>6</sub> | 3.57               | 0.026          | 0.72             | 0.88               | 0.20           | 0.82             | 1              |
| 298 K                         | Site A             |                |                  | Site B             |                |                  | R <sup>2</sup> |
|                               | q <sub>1,max</sub> | b <sub>1</sub> | 1/n <sub>1</sub> | q <sub>2,max</sub> | b <sub>2</sub> | 1/n <sub>2</sub> |                |
| C <sub>2</sub> H <sub>2</sub> | 3.61               | 0.02           | 0.85             | 0.058              | 0.09           | 1.66             | 0.99908        |
| C <sub>2</sub> H <sub>4</sub> | 3.02               | 0.007          | 0.91             | 0.78               | 0.07           | 0.92             | 0.9999         |
| C <sub>2</sub> H <sub>6</sub> | 0.67               | 0.10           | 0.90             | 2.80               | 0.012          | 0.84             | 1              |

Table S4 The summary of C<sub>2</sub>H<sub>2</sub> adsorption of some porous materials.

| No. | materials                     | C <sub>2</sub> H <sub>2</sub> |       | Ref       |
|-----|-------------------------------|-------------------------------|-------|-----------|
|     |                               | 273 K                         | 298 K |           |
| 1   | SOF-1a                        | 61                            | 50    | [1]       |
| 2   | HOF-1a                        | 63                            | 57    | [1]       |
| 3   | HOF-3a                        | 58                            | 47    | [1]       |
| 4   | HOF-5a                        | 183                           | 182   | [1]       |
| 5   | HOF-BTB                       | 110.3                         | 64.3  | [1]       |
| 6   | iPAF-1-OH                     | 150                           | 101.1 | [2]       |
| 7   | iPAF-1-F                      | 112                           | 87.5  | [2]       |
| 8   | iPAF-1-Cl                     | 68                            | 46.3  | [2]       |
| 9   | CPOCC-101 $\alpha$            |                               | 95    | [3]       |
| 10  | P(Ph-3MVIm-Cl)                | 43.5                          | 32.7  | [4]       |
| 11  | P(Ph-3MVIm-SiF <sub>6</sub> ) | 39.5                          | 29.5  | [4]       |
| 12  | P(Ph-6MVIm-Br)                | 43                            | 33.5  | [4]       |
| 13  | PAF-110                       | 77.9                          | 49.9  | [5]       |
| 14  | PAF-106c                      | 11.5                          | 10.3  | [6]       |
| 15  | CTF-PO71                      | 104                           | 74    | [7]       |
| 16  | PAF-104f                      | 71.8                          | 55.9  | This work |
| 17  | PAF-105g                      | 61.2                          | 38.3  | This work |

Table S5 The summary of C<sub>2</sub>H<sub>6</sub>/C<sub>2</sub>H<sub>4</sub> selectivity of some porous materials.

| No. | materials     | T/K | P/bar | S(C <sub>2</sub> H <sub>6</sub> /C <sub>2</sub> H <sub>4</sub> ) | Ref       |
|-----|---------------|-----|-------|------------------------------------------------------------------|-----------|
| 1   | COF-1         | 298 | 1     | 1.92                                                             | [8]       |
| 2   | COF-6         | 298 | 1     | 1.18                                                             | [8]       |
| 3   | COF-8         | 298 | 1     | 1.20                                                             | [8]       |
| 4   | COF-10        | 298 | 1     | 1.15                                                             | [8]       |
| 5   | MCOF-1        | 298 | 1     | 1.75                                                             | [8]       |
| 6   | COF-102       | 298 | 1     | 1.48                                                             | [8]       |
| 7   | COF-300       | 298 | 1     | 1.59                                                             | [8]       |
| 8   | COF-320       | 298 | 1     | 1.50                                                             | [8]       |
| 9   | Ni-DBA-3D-COF | 295 | 1     | 1.15                                                             | [8]       |
| 10  | CTF-DCTC-400  | 298 | 1     | 1.04                                                             | [9]       |
| 11  | CTF-DCTC-500  | 298 | 1     | 2.08                                                             | [9]       |
| 12  | ZIF-7         | 298 | 1     | 1.02                                                             | [10]      |
| 13  | PAF-106c      | 298 | 1     | 1.08                                                             | [6]       |
| 14  | HIAM-112      | 298 | 1     | 1.9                                                              | [11]      |
| 15  | PAF-104f      | 298 | 1     | 1.24                                                             | This work |
| 16  | PAF-105g      | 298 | 1     | 1.20                                                             | This work |

### Reference

- [1] T. U. Yoon, S. B. Baek, D. W. Kim, E. J. Kim, W. J. Lee, B. K. Singh, M. S. Lah, Y. S. Bae and K. S. Kim, *Chem. Commun.*, 2018, **54**, 9360-9363.
- [2] P. P. Zhang, X. Q. Zou, J. Song, Y. Y. Tian, Y. L. Zhu, G. L. Yu, Y. Yuan and G. S. Zhu, *Adv. Mater.*, 2020, **32**, 1907449.
- [3] W. J. Wang, K. Z. Su, E. S. M. El-Sayed, M. Yang and D. Q. Yuan, *ACS App. Mater. Inter.*, 2021, **13**, 24042-24050.
- [4] X. Suo, X. L. Cui, L. F. Yang, N. Xu, Y. Q. Huang, Y. He, S. Dai and H. B. Xing, *Adv. Mater.*, 2020, **32**, 1907601.
- [5] L. C. Jiang, Y. Y. Tian, T. Sun, Y. L. Zhu, H. Ren, X. Q. Zou, Y. H. Ma, K. R. Meihaus, J. R. Long and G. S. Zhu, *J. Am. Chem. Soc.*, 2018, **140**, 15724-15730.

- [6]X. L. Chen, Z. Y. Yuan, Y. C. Zhong and H. Ren, *Chem. J. Chin. Univ.*, 2022, **43**, 20210771.
- [7]Y. Lu, J. He, Y. L. Chen, H. Wang, Y. F. Zhao and Y. Ding, *Macromol. Rapid Commun.*, 2017, **39**, 1700468.
- [8]C. He, Y. Wang, Y. Chen, X. Wang, J. Yang, L. Li and J. Li, *ACS App. Mater. Inter.*, 2020, **12**, 52819-52825.
- [9]Y. J. Chang, H. L. Huang, H. J. Zhu, Y. L. Zhao, L. Wang, Y. X. Sun and C. L. Zhong, *Chem. Eng. J.*, 2022, **427**, 131726.
- [10]H. Thakkar, Q. Al-Naddaf, N. Legion, M. Hovis, A. Krishnamurthy, A. A. Rownaghi and F. Rezaei, *ACS Sustain. Chem. Eng.*, 2018, **6**, 15228-15237.
- [11]J. Q. Liu, J. F. Miao, S. Ullah, K. Zhou, L. Yu, H. Wang, Y. F. Wang, T. Thonhauser and J. Li, *ACS. Mater. Lett.*, 2022, **4**, 1227-1232.
